# Supplementary material for: Enzyme-photo-coupled catalytic systems
Source: Royal Society of Chemistry journal article supplement (doi:10.1039/d1cs00392e), 2021-01-01
Supplement: d1cs00392e1.pdf [file d1cs00392e1.pdf]

## Electronic supplementary information

### Enzyme-Photo-coupled Catalytic Systems

Shaohua Zhang<sup>2,7</sup>, Shusong Liu<sup>1</sup>, Yiyi Sun<sup>2</sup>, Shihao Li<sup>2</sup>, Jiafu Shi<sup>1,4,5,6,\*</sup>, Zhongyi Jiang<sup>2,3,4,\*</sup>

<sup>1</sup> School of Environmental Science and Engineering, Tianjin University, Tianjin 300072, China.

<sup>2</sup> Key Laboratory for Green Chemical Technology of Ministry of Education, School of Chemical Engineering and Technology, Tianjin University, Tianjin 300072, China.

<sup>3</sup> Collaborative Innovation Center of Chemical Science and Engineering (Tianjin), Tianjin 300072, China.

<sup>4</sup> Joint School of National University of Singapore and Tianjin University, International Campus of Tianjin University, Binhai New City, Fuzhou, 350207, China

<sup>5</sup> State Key Laboratory of Biochemical Engineering, Institute of Process Engineering, Chinese Academy of Sciences, Beijing, 10090, China

<sup>6</sup> Tianjin Institute of Industrial Biotechnology, Chinese Academy of Sciences, Tianjin 300308, China.

<sup>7</sup> Institute of Molecules and Materials, Radboud University, Heyendaalseweg 135, Nijmegen 6525 AJ, The Netherlands

\* Corresponding authors: zhyjiang@tju.edu.cn (ZJ); shijiafu@tju.edu.cn (JS)

**Table S1.** Typical reactions by EPCS during the past five years.

| EPCS                                           | biocatalyst              | photocatalyst                           | redox mediator | reaction                                          | light source                        | substrate                                               | c(substrate) (mM)   | product                                              | performance                                             | refs |
|------------------------------------------------|--------------------------|-----------------------------------------|----------------|---------------------------------------------------|-------------------------------------|---------------------------------------------------------|---------------------|------------------------------------------------------|---------------------------------------------------------|------|
| Sequential-cascade photobiocatalytic reactions | ene-reductase            | Ir-16 or FMN                            | —              | asymmetric reduction of alkenes                   | blue LED lamp (465 nm)              | 2-phenylbut-2-enedioic acid dimethyl ester, <i>etc.</i> | 5 mM                | ( <i>R</i> )-dimethyl 2-phenylsuccinate, <i>etc.</i> | 87% yield, >99% e.e. (15 h), 290 $\mu\text{M h}^{-1}$   | 1    |
|                                                | ketoreductase            | [Ru(bpy) <sub>3</sub> Cl <sub>2</sub> ] | —              | enantioselective synthesis of 1,3-mercaptoalkanol | blue LED bulb or visible light bulb | 3-buten-2-one and mercaptane                            | 57 mM               | 1,3-mercaptoalkanols                                 | 73% yield, > 99% e.e. (24 h), 1730 $\mu\text{M h}^{-1}$ | 2    |
|                                                | lipase                   | —                                       | —              | kinetic enzymatic resolution                      | —                                   | racemic phenylthio-2-butanol                            | 1130 mM             | —                                                    | 43% yield, > 99% e.e., —                                | 3    |
|                                                | monoamine oxidase        | [Ir(sppy) <sub>3</sub> ]                | —              | enantioselective synthesis of amines              | blue LED lamp (405 nm)              | 2-cyclohexyl-1-pyrroline, <i>etc.</i>                   | 10 mM               | ( <i>R</i> )-2-cyclohexyl-1-pyrrolidine, <i>etc.</i> | 92% yield, > 99% e.e. (30 h), 310 $\mu\text{M h}^{-1}$  | 4    |
|                                                | ketoreductase            | 9-mesityl-10-methylacridinium ion       | —              | C-H hydroxylation                                 | blue LED lamp                       | substituted ethylbenzenes, <i>etc.</i>                  | — (up to 5 g scale) | ( <i>R</i> )-1-(4-methoxyphenyl)ethanol, <i>etc.</i> | 85% yield, >99% e.e. (24 h), —                          | 5    |
|                                                | vanillyl alcohol oxidase | —                                       | —              | —                                                 | —                                   | 4-ethylphenol                                           | 23 mM               | ( <i>R</i> )-1-(4'-hydroxyphenyl)ethanol             | 36% yield, >97% e.e. (24 h), 350 $\mu\text{M h}^{-1}$   | 6    |
|                                                | oleate hydratases        | fatty acid photodecarboxylase           | —              | synthesis of chiral secondary fatty alcohols      | blue LED lamp (450 nm)              | linoleic acid, <i>etc.</i>                              | 5 mM                | chiral secondary fatty alcohols                      | 74% yield, 99% e.e. (11+ 6 h), 220 $\mu\text{M h}^{-1}$ | 7    |

**Table S1: (Continued)**

| EPCS                                         | biocatalyst                       | photocatalyst                                                                                              | redox mediator | reaction                 | light source                | substrate                                            | c(substrate) (mM)                      | product        | performance                                                                                           | refs         |                 |                                                                                                       |    |
|----------------------------------------------|-----------------------------------|------------------------------------------------------------------------------------------------------------|----------------|--------------------------|-----------------------------|------------------------------------------------------|----------------------------------------|----------------|-------------------------------------------------------------------------------------------------------|--------------|-----------------|-------------------------------------------------------------------------------------------------------|----|
| Parallel-cascade photobiocatalytic reactions | [NiFeSe] hydrogenase              | ammonium-carbon dots                                                                                       | —              | H <sub>2</sub> evolution | Xe lamp (AM 1.5G)           | H <sub>2</sub> O and EDTA                            | 100 mM EDTA                            | H <sub>2</sub> | TOF: 3.9×10 <sup>3</sup> h <sup>-1</sup> ,<br>TTN: 5.2×10 <sup>4</sup> ,<br>0.20 μmol h <sup>-1</sup> | 8            |                 |                                                                                                       |    |
|                                              |                                   | porous In <sub>2</sub> S <sub>3</sub>                                                                      |                |                          | Xe lamp                     | H <sub>2</sub> O and Na <sub>2</sub> SO <sub>3</sub> | 200 mM Na <sub>2</sub> SO <sub>3</sub> |                | TOF: 3.5×10 <sup>6</sup> h <sup>-1</sup> ,<br>—,<br>0.90 μmol h <sup>-1</sup>                         | 9            |                 |                                                                                                       |    |
|                                              |                                   | perovskite/BiVO <sub>4</sub> /TiCo                                                                         |                |                          | Xe lamp (AM 1.5G)           | H <sub>2</sub> O                                     | —                                      |                | TOF: 1.5×10 <sup>4</sup> h <sup>-1</sup> ,<br>TTN: 2.5×10 <sup>5</sup> ,<br>0.74 μmol h <sup>-1</sup> | 10           |                 |                                                                                                       |    |
|                                              |                                   | PS II/Os(bipy) <sub>2</sub> Cl-polymer/<br>diketopyrrolopyrrole                                            |                |                          | Xe lamp (AM 1.5G, > 420 nm) | H <sub>2</sub> O                                     | —                                      |                | TOF: 375 h <sup>-1</sup> ,<br>—,<br>0.015 μmol h <sup>-1</sup>                                        | 11           |                 |                                                                                                       |    |
|                                              | [FeFe] hydrogenase                | mercaptocarboxylate-CdS nanorods                                                                           |                |                          | blue LED lamp (405 nm)      | H <sub>2</sub> O and ascorbate                       | 100 mM ascorbate                       |                | —                                                                                                     | 12           |                 |                                                                                                       |    |
|                                              | [NiFe]-hydrogenase                | Ag nanoclusters                                                                                            |                |                          | arc lamp (> 420 nm)         | H <sub>2</sub> O and TEOA                            | 100 mM TEOA                            |                | TOF: 7.0×10 <sup>5</sup> h <sup>-1</sup> ,<br>—,<br>134.4 μmol h <sup>-1</sup>                        | 13           |                 |                                                                                                       |    |
|                                              | CO dehydrogenase I                | Ag nanoclusters                                                                                            |                |                          | —                           | CO <sub>2</sub> reduction                            | arc lamp (> 420 nm)                    |                | CO <sub>2</sub> and TEOA                                                                              | 100 mM TEOA  | CO              | TOF: 7.2×10 <sup>4</sup> h <sup>-1</sup> ,<br>TTN: 2.5×10 <sup>5</sup> ,<br>36.1 μmol h <sup>-1</sup> | 14 |
|                                              | W-dependent formate dehydrogenase | PS II/Os(bipy) <sub>2</sub> Cl-polymer/<br>diketopyrrolopyrrole<br>perovskite/BiVO <sub>4</sub> /<br>FeOOH |                |                          | —                           | CO <sub>2</sub> reduction                            | Xe lamp (AM 1.5G, >420 nm)             |                | CO <sub>2</sub> and H <sub>2</sub> O                                                                  | —            | formate         | TOF: 1.4×10 <sup>3</sup> h <sup>-1</sup> ,<br>—,<br>0.046 μmol h <sup>-1</sup>                        | 15 |
|                                              |                                   |                                                                                                            |                |                          | Xe lamp (>420 nm)           |                                                      | —,<br>1.06 μmol h <sup>-1</sup>        |                |                                                                                                       |              |                 | 16                                                                                                    |    |
|                                              | nitrogenase MoFe protein          | MPA-CdS nanorods                                                                                           |                |                          | —                           | N <sub>2</sub> to NH <sub>3</sub> conversion         | blue LED lamp (405 nm)                 |                | N <sub>2</sub> and HEPES                                                                              | 500 mM HEPES | NH <sub>3</sub> | TOF: 4.5×10 <sup>3</sup> h <sup>-1</sup> ,<br>TTN: 1.1×10 <sup>4</sup> ,<br>22.2 nmol h <sup>-1</sup> | 17 |

**Table S1: (Continued)**

| EPCS                                           | biocatalyst                                                             | photocatalyst                                                                 | redox mediator                                                        | reaction                        | light source                   | substrate                               | c(substrate) (mM)                                       | product                                                                         | performance                            | refs |
|------------------------------------------------|-------------------------------------------------------------------------|-------------------------------------------------------------------------------|-----------------------------------------------------------------------|---------------------------------|--------------------------------|-----------------------------------------|---------------------------------------------------------|---------------------------------------------------------------------------------|----------------------------------------|------|
| Parallel-cascade photobiocatalytic reactions   | formate dehydrogenase                                                   | Co-Pi/ $\alpha$ -Fe <sub>2</sub> O <sub>3</sub>                               | NAD <sup>+</sup> /<br>NADH                                            | CO <sub>2</sub> reduction       | Xe lamp (>420 nm)              | CO <sub>2</sub> and H <sub>2</sub> O    | —                                                       | formate                                                                         | 1300 $\mu$ M h <sup>-1</sup>           | 18   |
|                                                |                                                                         | porphyrin/SiO <sub>2</sub> /Cp*Rh(bpy)Cl                                      |                                                                       |                                 |                                | CO <sub>2</sub> and TEOA                | 15% w/v TEOA                                            |                                                                                 | 2500 $\mu$ M h <sup>-1</sup>           | 19   |
|                                                | formate dehydrogenase and glucose dehydrogenase                         | —                                                                             | —                                                                     | —                               | —                              | CO <sub>2</sub> and glucose             | 50 mM glucose                                           | —                                                                               | 110 $\mu$ M h <sup>-1</sup>            | 20   |
|                                                | formate/formaldehyde/ alcohol dehydrogenase                             | Co-Pi/ $\alpha$ -Fe <sub>2</sub> O <sub>3</sub> / BiFeO <sub>3</sub>          | NAD <sup>+</sup> /<br>NADH                                            | CO <sub>2</sub> reduction       | Xe lamp (>420 nm)              | CO <sub>2</sub> and H <sub>2</sub> O    | —                                                       | methanol                                                                        | 220 $\mu$ M h <sup>-1</sup>            | 21   |
|                                                |                                                                         |                                                                               |                                                                       |                                 |                                | CO <sub>2</sub> and ascorbate           | 400 mM ascorbate                                        |                                                                                 | 99 $\mu$ M h <sup>-1</sup>             | 22   |
|                                                |                                                                         |                                                                               |                                                                       |                                 |                                | CO <sub>2</sub> and TEOA                | 15% w/v TEOA                                            |                                                                                 | 6 $\mu$ M h <sup>-1</sup>              | 23   |
|                                                | formate/formaldehyde/ alcohol dehydrogenase and glutamate dehydrogenase | —                                                                             | —                                                                     | —                               | —                              | CO <sub>2</sub> and <i>L</i> -glutamate | 10 mM <i>L</i> -glutamate                               | —                                                                               | 8 $\mu$ M h <sup>-1</sup>              | 24   |
|                                                | ene-reductase                                                           | FeOOH-BiVO <sub>4</sub>                                                       | FMN/<br>FMNH <sub>2</sub>                                             | asymmetric reduction of alkenes | Xe lamp (>420 nm)              | ketoisophorone                          | 50 mM                                                   | ( <i>R</i> )-levodione                                                          | 88% e.e., 1060 $\mu$ M h <sup>-1</sup> | 25   |
|                                                |                                                                         | rose bengal                                                                   | —                                                                     |                                 |                                | 2-methylcyclohexenone                   | 8 mM                                                    | ( <i>R</i> )-2-methylcyclohexanone                                              | 99% e.e., 2920 $\mu$ M h <sup>-1</sup> | 26   |
|                                                | peroxygenase                                                            | Au-TiO <sub>2</sub>                                                           | H <sub>2</sub> O <sub>2</sub> /H <sub>2</sub> O                       | oxyfunctionalization            | Xe lamp (>400 nm)              | ethylbenzene                            | 15 mM                                                   | (R)-1-phenylethanol                                                             | 98% e.e., 30 $\mu$ M h <sup>-1</sup>   | 27   |
| 100 mM                                         |                                                                         |                                                                               |                                                                       |                                 |                                |                                         | 95% e.e., 720 $\mu$ M h <sup>-1</sup>                   |                                                                                 | 28                                     |      |
| 100 mM                                         |                                                                         |                                                                               |                                                                       |                                 |                                |                                         | 99% e.e., 890 $\mu$ M h <sup>-1</sup>                   |                                                                                 | 29                                     |      |
| flavin modified single-walled carbon nanotubes |                                                                         | —                                                                             | —                                                                     | —                               | —                              | ethylbenzene and methanol               | two liquid phases                                       | 95% yield, >99% e.e. (24 h), 2900 $\mu$ M h <sup>-1</sup>                       | 30                                     |      |
| peroxygenase and PpAOx                         | —                                                                       | —                                                                             | —                                                                     | —                               | ethylbenzene and methanol      | two liquid phases                       | —                                                       | 95% yield, >99% e.e. (24 h), 2900 $\mu$ M h <sup>-1</sup>                       | 30                                     |      |
| peroxygenase and ene-reductase                 | Mo-doped BiVO <sub>4</sub>                                              | FMN/<br>FMNH <sub>2</sub> and H <sub>2</sub> O <sub>2</sub> /H <sub>2</sub> O | hydroxylation of ethylbenzene and tans-hydrogenation of ketoisophrone | Xe lamp (>400 nm)               | ethylbenzene and ketoisophrone | 100 mM and 10 mM                        | ( <i>R</i> )-1-phenylethanol and ( <i>R</i> )-levodione | 99% e.e., 510 $\mu$ M h <sup>-1</sup> ; 82% e.e., 500 $\mu$ M h <sup>-1</sup> ; | 31                                     |      |

**Table S1: (Continued)**

| EPCS                                          | biocatalyst                   |                              | photocatalyst                               | redox mediator                                          | reaction                                             | light source                                                       | substrate                                                             | c(substrate) (mM)                                  | product                                                                       | performance                                           | refs |
|-----------------------------------------------|-------------------------------|------------------------------|---------------------------------------------|---------------------------------------------------------|------------------------------------------------------|--------------------------------------------------------------------|-----------------------------------------------------------------------|----------------------------------------------------|-------------------------------------------------------------------------------|-------------------------------------------------------|------|
| Photoenzyme catalysed reactions               | fatty acid photodecarbonylase | wild-type                    | FAD                                         | —                                                       | decarboxylation of (functionalized) carboxylic acids | blue LED lamp (450 nm)                                             | margaric acid, <i>etc.</i>                                            | 30 mM                                              | alkanes                                                                       | 96% yield (14 h), 2050 $\mu\text{M h}^{-1}$           | 32   |
|                                               |                               | G462Y                        |                                             |                                                         |                                                      |                                                                    | pentanoic acid, <i>etc.</i>                                           | 150 mM                                             | butane, <i>etc.</i>                                                           | 810 $\mu\text{M h}^{-1}$                              | 33   |
|                                               |                               | V453E                        |                                             |                                                         |                                                      |                                                                    | racemic 2-hydroxyoctanoic acid, <i>etc.</i>                           | 10 mM                                              | ( <i>R</i> )-2-hydroxyoctanoic acid, <i>etc.</i>                              | 51% yield, 99% e.e. (12 h), 430 $\mu\text{M h}^{-1}$  | 34   |
|                                               |                               | I398L and G462A              |                                             |                                                         |                                                      |                                                                    | elaidic acid                                                          | 7 mM                                               | ( <i>E</i> )-heptadec-8-ene                                                   | 99% yield (0.5 h), 13860 $\mu\text{M h}^{-1}$         | 35   |
|                                               |                               | G462I and G462V              |                                             |                                                         |                                                      | palmitic acid, <i>etc.</i>                                         | 80 mM                                                                 | pentadecane-1-d, <i>etc.</i>                       | 99% yield (12 h), 6600 $\mu\text{M h}^{-1}$                                   | 36                                                    |      |
|                                               |                               |                              |                                             |                                                         | blue LED lamp (455 nm)                               | butyric acid                                                       | 50 mM                                                                 | propane                                            | 4.32 $\mu\text{M h}^{-1}$                                                     | 37                                                    |      |
| Photo-induced non-natural enzymatic reactions | ketoreductases                |                              | NAD(P)H-substrate (charge transfer complex) | —                                                       | enantioselective radical dehalogenation              | blue LED lamp (460 nm)                                             | 3-bromo-3-phenyltetrahydro-2H-pyran-2-one, <i>etc.</i>                | 30 mM                                              | ( <i>R</i> )-3-phenyltetrahydro-2H-pyran-2-one, <i>etc.</i>                   | 81% yield, 98% e.e. (12 h), 2050 $\mu\text{M h}^{-1}$ | 38   |
|                                               | double-bond reductases        |                              | rose bengal                                 | —                                                       | enantioselective deacetoxylation                     | green LED lamp (530 nm)                                            | 2-methyl-1-oxo-1,2,3,4-tetrahydronaphthalen-2-yl acetate, <i>etc.</i> | 24 mM                                              | ( <i>S</i> )-2-methyl-3,4-dihydronaphthalen-1(2H)-one, <i>etc.</i>            | 87% yield, 93% e.e. (12 h), 1740 $\mu\text{M h}^{-1}$ | 39   |
|                                               | ene-reductases                |                              | FMNH <sup>-</sup> -substrate                | —                                                       | asymmetric radical cyclization                       | cyan LED lamp (497 nm)                                             | 2-chloro- <i>N</i> -cinnamyl- <i>N</i> -methylacetamide, <i>etc.</i>  | 18 mM                                              | ( <i>R</i> )-4-benzyl-1-methylpyrrolidin-2-one, <i>etc.</i>                   | 77% yield, 94% e.e. (8 h), 1720 $\mu\text{M h}^{-1}$  | 40   |
|                                               |                               |                              | FMN                                         | —                                                       | asymmetric redox-neutral radical cyclization         | cyan LED lamp (497 nm)                                             | methyl 2-chloro-2-(methyl(phenyl)carbamoyl)butanoate, <i>etc.</i>     | 10 mM                                              | methyl ( <i>S</i> )-3-ethyl-1-methyl-2-oxoindoline-3-carboxylate, <i>etc.</i> | 95% yield, 95% e.e. (24 h), 400 $\mu\text{M h}^{-1}$  | 41   |
|                                               |                               | FMNH <sup>-</sup> -substrate | —                                           | enantioselective intermolecular radical hydroalkylation | blue LED lamp (463 nm)                               | 2-bromo-1-phenylethan-1-one and prop-1-en-2-ylbenzene, <i>etc.</i> | 10 mM and 5 mM                                                        | ( <i>S</i> )-1,4-Diphenylpentan-1-one, <i>etc.</i> | 88% yield, 96% e.e. (16 h), 280 $\mu\text{M h}^{-1}$                          | 42                                                    |      |

**Table S2.** Engineered photoautotrophic microorganisms for solar-driven chemical transformation

| engineered photoautotrophic microorganisms | biocatalyst                   | photocatalyst | redox mediator                                 | reaction                        | light source | substrate                              | c(substrate) (mM) | product                             | performance              | refs |
|--------------------------------------------|-------------------------------|---------------|------------------------------------------------|---------------------------------|--------------|----------------------------------------|-------------------|-------------------------------------|--------------------------|------|
| cyanobacteria                              | isoprene biosynthetic pathway | thylakoid     | NADP <sup>+</sup> /<br>NADPH<br>and<br>ADP/ATP | CO <sub>2</sub> reduction       | —            | CO <sub>2</sub> and H <sub>2</sub> O   | fed-batch         | isoprene                            | 63 μM h <sup>-1</sup>    | 43   |
|                                            | fed-batch                     |               |                                                |                                 |              |                                        | 1-butanol         | 170 μM h <sup>-1</sup>              | 44                       |      |
|                                            | 20 mM NaHCO <sub>3</sub>      |               |                                                |                                 |              |                                        | ethylene          | 2.2 μM h <sup>-1</sup>              | 45                       |      |
| cyanobacteria                              | enoate reductase              | thylakoid     | NADP <sup>+</sup> /<br>NADPH                   | asymmetric reduction of alkenes | LED lamp     | 2-methylmaleimide and H <sub>2</sub> O | 10 mM             | 2-methylsuccinimide                 | 10000 μM h <sup>-1</sup> | 46   |
|                                            |                               |               |                                                |                                 |              |                                        | 10 mM             |                                     | 18300 μM h <sup>-1</sup> | 47   |
| cyanobacteria                              | alkane monooxygenase          | thylakoid     | NADP <sup>+</sup> /<br>NADPH                   | oxyfunctionalization            | LED lamp     | nonanoic acid methyl ester             | 10 mM             | w-hydroxynonanoic acid methyl ester | 195 μM h <sup>-1</sup>   | 48   |

## References

1. Z. C. Litman, Y. Wang, H. Zhao and J. F. Hartwig, *Nature*, 2018, **560**, 355-359.
2. K. Lauder, A. Toscani, Y. Qi, J. Lim, S. J. Charnock, K. Korah and D. Castagnolo, *Angew. Chem. Int. Ed.*, 2018, **57**, 5803-5807.
3. K. J. Hwang, J. Lee, S. Chin, C. J. Moon, W. Lee, C. S. Baek and H. J. Kim, *Arch. Pharm. Res.*, 2003, **26**, 997-1001.
4. X. Guo, Y. Okamoto, M. R. Schreier, T. R. Ward and O. S. Wenger, *Chem. Sci.*, 2018, **9**, 5052-5056.
5. R. C. Betori, C. M. May and K. A. Scheidt, *Angew. Chem. Int. Ed.*, 2019, **131**, 16642-16646.
6. T. A. Ewing, J. Kühn, S. Segarra, M. Tortajada, R. Zuhse and W. J. H. van Berkel, *Adv. Synth. Catal.*, 2018, **360**, 2370-2376.
7. W. Zhang, J. H. Lee, S. H. H. Younes, F. Tonin, P. L. Hagedoorn, H. Pichler, Y. Baeg, J. B. Park, R. Kourist and F. Hollmann, *Nat. Commun.*, 2020, **11**, 2258.
8. G. A. M. Hutton, B. Reuillard, B. C. M. Martindale, C. A. Caputo, C. W. J. Lockwood, J. N. Butt and E. Reisner, *J. Am. Chem. Soc.* 2016, **138**, 16722-16730.
9. C. Tapia, S. Zacarias, I. A. C. Pereira, J. C. Conesa, M. Pita and A. L. De Lacey, *ACS Catal.*, 2016, **6**, 5691-5698.
10. E. E. Moore, V. Andrei, S. Zacarias, I. A. C. Pereira and E. Reisner, *ACS Energy Lett.*, 2020, **5**, 232-237.
11. K. P. Sokol, W. E. Robinson, J. Warnan, N. Kornienko, M. M. Nowaczyk, A. Ruff, J. Z. Zhang and E. Reisner, *Nat. Energy*, 2018, **3**, 944-951.
12. M. B. Wilker, J. K. Utterback, S. Greene, K. A. Brown, D. W. Mulder, P. W. King and G. Dukovic, *J. Phys. Chem. C*, 2018, **122**, 741-750.
13. L. Zhang, S. E. Beaton, S. B. Carr and F. A. Armstrong, *Energy Environ. Sci.*, 2018, **11**, 3342-3348.
14. L. Zhang, M. Can, S. W. Ragsdale and F. A. Armstrong, *ACS Catal.*, 2018, **8**, 2789-2795.
15. K. P. Sokol, W. E. Robinson, A. R. Oliveira, J. Warnan, M. M. Nowaczyk, A. R., I. A. C. Pereira and E. Reisner, *J. Am. Chem. Soc.*, 2018, **140**, 16418-16422.
16. S. K. Kuk, Y. Ham, K. Gopinath, P. Boonmongkolras, Y. Lee, Y. W. Lee, S. Kondaveeti, C. Ahn, B. Shin, J. K. Lee, S. Jeon and C. B. Park, *Adv. Energy Mater.*, 2019, **9**, 1900029.
17. K. A. Brown, D. F. Harris, M. B. Wilker, A. Rasmussen, N. Khadka, H. Hamby, S. Keable, G. Dukovic, J. W. Peters, L. C. Seefeldt and P. W. King, *Science*, 2016, **352**, 448-450.
18. D. H. Nam, S. K. Kuk, H. Choe, S. Lee, J. W. Ko, E. J. Son, E. G. Choi, Y. H. Kim and C. B. Park, *Green Chem.*, 2016, **18**, 5989-5993.
19. X. Ji, J. Wang, L. Mei, W. Tao, A. Barrett, Z. Su, S. Wang, G. Ma, J. Shi and S. Zhang, *Adv. Funct. Mater.*, 2018, **28**, 1705083.
20. X. Yu, D. Nix, X. Ge, H. Liu, R. Hille and A. Mulchandani, *Biochemistry*, 2019, **58**, 1861-1868.
21. S. K. Kuk, R. K. Singh, D. H. Nam, R. Singh, J. K. Lee and C. B. Park, *Angew. Chem. Int. Ed.*, 2017, **56**, 3827-3832.

22. S. Zhang, J. Shi, Y. Sun, Y. Wu, Y. Zhang, Z. Cai, Y. Chen, C. You, P. Han and Z. Jiang, *ACS Catal.*, 2019, **9**, 3913-3925.
23. X. Ji, Z. Su, P. Wang, G. Ma and S. Zhang, *Small*, 2016, **12**, 4753-4762.
24. X. Ji, Z. Su, P. Wang, G. Ma and S. Zhang, *ACS Nano*, 2015, **9**, 4600-4610.
25. E. J. Son, S. H. Lee, S. K. Kuk, M. Pesic, D. S. Choi, J. W. Ko, K. Kim, F. Hollmann and C. B. Park, *Adv. Funct. Mater.*, 2018, **28**, 1705232.
26. S. H. Lee, D. S. Choi, M. Pesic, Y. W. Lee, C. E. Paul, F. Hollmann and C. B. Park, *Angew. Chem. Int. Ed.*, 2017, **56**, 8681-8685.
27. W. Zhang, E. Fernández-Fueyo, Y. Ni, M. van Schie, J. Gacs, R. Renirie, R. Wever, F. G. Mutti, D. Rother, M. Alcalde and F. Hollmann, *Nat. Catal.*, 2018, **1**, 55-62.
28. D. S. Choi, Y. Ni, E. Fernández-Fueyo, M. Lee, F. Hollmann and C. B. Park, *ACS Catal.*, 2017, **7**, 1563-1567.
29. D. S. Choi, H. Lee, F. Tieves, Y. W. Lee, E. J. Son, W. Zhang, B. Shin, F. Hollmann and C. B. Park, *ACS Catal.*, 2019, **9**, 10562-10566.
30. E. Fernández-Fueyo, Y. Ni, A. G. Baraibar, M. Alcalde, L. M. van Langen and F. Hollmann, *J. Mol. Catal. B-Enzym.*, 2016, **134**, 347-352.
31. D. S. Choi, J. Kim, F. Hollmann and C. B. Park, *Angew. Chem. Int. Ed.*, 2020, **59**, 15886-15890.
32. M. M. E. Huijbers, W. Zhang, F. Tonin, and F. Hollmann, *Angew. Chem. Int. Ed.*, 2018, **57**, 13648-13651.
33. W. Zhang, M. Ma, M. M. E. Huijbers, G. A. Filonenko, E. A. Pidko, M. van Schie, S. de Boer, B. O. Burek, J. Z. Bloh, W. J. H. van Berkel, W. A. Smith, and F. Hollmann, *J. Am. Chem. Soc.*, 2019, **141**, 3116-3120.
34. J. Xu, Y. Hu, J. Fan, M. Arkin, D. Li, Y. Peng, W. Xu, X. Lin, and Q. Wu, *Angew. Chem. Int. Ed.*, 2019, **58**, 8474-8478.
35. D. Li, T. Han, J. Xue, W. Xu, J. Xu and Q. Wu, *Angew. Chem. Int. Ed.*, 2021, **60**, 1-6.
36. J. Xu, J. Fan, Y. Lou, W. Xu, Z. Wang, D. Li, H. Zhou, X. Lin, and Q. Wu, *Nat. Commun.*, 2021, **12**, 3983.
37. M. Amer, E. Z. Wojcik, C. Sun, R. Hoeven, J. M. X. Hughes, M. Faulkner, I. S. Yunus, S. Tait, L. O. Johannissen, S. J. O. Hardman, D. J. Heyes, G. Q. Chen, M. H. Smith, P. R. Jones, H. S. Toogood and N. S. Scrutton, *Energy Environ. Sci.*, 2020, **13**, 1818-1831.
38. M. A. Emmanuel, N. R. Greenberg, D. G. Oblinsky and T. K. Hyster, *Nature*, 2016, **540**, 414-417.
39. K. F. Biegasiewicz, S. J. Cooper, M. A. Emmanuel, D. C. Miller and T. K. Hyster, *Nat. Chem.*, 2018, **10**, 770-775.
40. K. F. Biegasiewicz, S. J. Cooper, X. Gao, D. G. Oblinsky, J. H. Kim, S. E. Garfinkle, L. A. Joyce, B. A. Sandoval, G. D. Scholes and T. K. Hyster, *Science*, 2019, **364**, 1166-1169.
41. M. J. Black, K. F. Biegasiewicz, A. J. Meichan, D. G. Oblinsky, B. Kudisch, G. D. Scholes and T. K. Hyster, *Nat. Chem.*, 2019, **12**, 71-75.
42. X. Huang, B. Wang, Y. Wang, G. Jiang, J. Feng and H. Zhao, *Nature*, 2020, **584**, 69-74.
43. X. Gao, F. Gao, D. Liu, H. Zhang, X. Nie and C. Yang, *Energy Environ. Sci.*, 2016, **9**, 1400-



1411.

44. X. Liu, R. Miao, P. Lindberg and P. Lindblad, *Energy Environ. Sci.*, 2019, **12**, 2765-2777.
45. S. Vajravel, S. Sirin, S. Kosourov and Y. Allahverdiyev, *Green Chem.*, 2020, **22**, 6404-6414.
46. K. Köninger, Á. G. Baraibar, C. Mügge, C. E. Paul, F. Hollmann, M. M. Nowaczyk, R. Kourist, *Angew.Chem. Int. Ed.*, 2016, **55**, 5582-5585.
47. L. Assil-Companiononi, H. C. Büchenschütz, D. Solymosi, N. G. Dyczmons-Nowaczyk, K. K. F. Bauer, S. Wallner, P. Macheroux, Y. Allahverdiyeva, M. M. Nowaczyk and Robert Kourist, *ACS Catal.*, 2020, **10**, 11864-11877.
48. A. Hoschek, B. Bghler and A. Schmid, *Angew.Chem. Int. Ed.*, 2017, **56**, 15146-15149.
